# Supplementary material
Source: PubMed Central journal article supplement (PMC3289320)
Supplement: 1121400109_pnas.201121400SI.pdf [file 1121400109_pnas.201121400SI.pdf]

# Supporting Information

Schwartz et al. 10.1073/pnas.1121400109

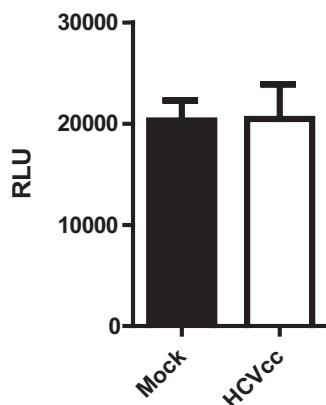

**Fig. S1.** Induced pluripotent stem cells (iPSCs) do not support hepatitis C virus (HCV) infection. iPSCs and iPSC-derived hepatocyte-like cells were infected concurrently with HCV reporter virus expressing secreted *Gaussia* luciferase (HCVcc;  $n = 6$ ) or were mock infected (mock;  $n = 6$ ). Cells subsequently were sampled and washed daily. After 5 d supernatants were collected and assayed for luciferase activity. Mock- and HCV-infected iPSCs showed no statistically significant difference by two-tailed  $t$  test. RLU, relative light units.

## Other Supporting Information Files

[Dataset S1 \(XLSX\)](#)
